# Supplementary material
Source: publisher figshare collection journal article supplement (https://aacr.figshare.com/articles/dataset/_/23553192)
Supplement: Supplementary file 1 [file 41323701]

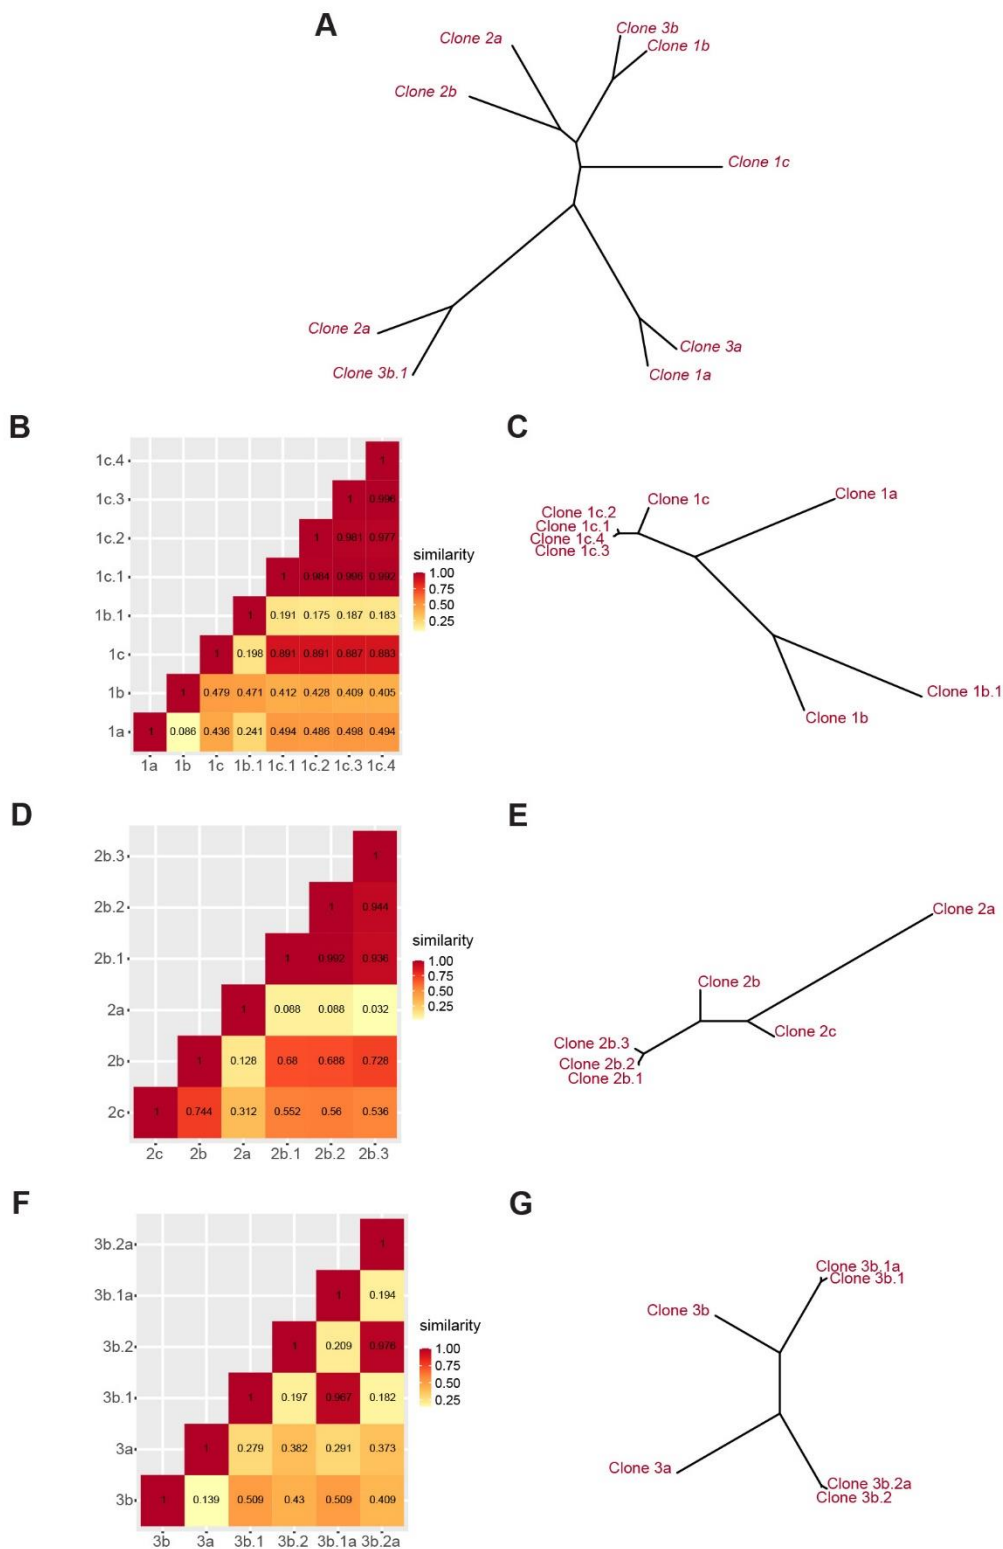

**Supplementary Figure S11 | Similarity analysis to determine subclonal relationships. A,** Neighbor-joining tree diagram showing relatedness of NCH-H209 subclone commonality between the three experimental arms. Similarity matrices (**B, D, F**) and evolutionary trees (**C, E, G**) for Arm 1 (**B, C**), Arm 2 (**D, E**), and Arm 3 (**F, G**).
